# Supplementary material
Source: PubMed Central journal article supplement (PMC7726939)
Supplement: ao0c05049_si_001.pdf [file ao0c05049_si_001.pdf]

# Supporting Information

## Complementary Base Lowers the Barrier in SuFEx Click Chemistry for Primary Amine Nucleophiles

Jan-Niclas Luy<sup>1</sup>, Ralf Tonner<sup>1\*</sup>

<sup>1</sup>Institut für Physikalische und Theoretische Chemie, Fakultät für Chemie und Pharmazie, Universität Regensburg, Universitätsstraße 31, 93053 Regensburg, Germany

\*Corresponding author: ralf.tonner@chemie.uni-regensburg.de

### Table of contents

|                                                                                   |     |
|-----------------------------------------------------------------------------------|-----|
| 1) Method benchmark.....                                                          | S2  |
| 2) Alternative base catalysed TS structure .....                                  | S3  |
| 3) Final structures .....                                                         | S4  |
| 4) Electronic reaction energies .....                                             | S5  |
| 5) Structure & output repository.....                                             | S5  |
| 6) Energy decomposition analysis .....                                            | S6  |
| 7) ADF sample input.....                                                          | S7  |
| 8) Animated IRC .....                                                             | S9  |
| 9) Cartesian coordinates, total energies and number of imaginary frequencies..... | S10 |
| 10) References.....                                                               | S19 |

## 1) Method benchmark

We benchmark the performance of several density functionals against advanced wave function-based approaches. The structures on which the benchmark was performed are not strictly identical to those reported in the main document.

**Table S1.** Stationary points on the SuFEx reaction path calculated with different density functionals and wave function-based methods using structures optimized by PBE-D3.

|                           | PBE-D3 | TPSS-D3 <sup>SS1</sup> | PBE0-D3 | B3LYP-D3 <sup>SS2</sup> | M06 <sup>SS3</sup> | MP2 <sup>SS4</sup> | CCSD <sup>SS4</sup> | CCSD(T) <sup>SS4</sup> |
|---------------------------|--------|------------------------|---------|-------------------------|--------------------|--------------------|---------------------|------------------------|
| $\Sigma(\text{products})$ | 1      | 10                     | -8      | -5                      | -7                 | -18                | -14                 | -14                    |
| pre-complex               | -31    | -28                    | -30     | -30                     | -25                | -28                | -25                 | -27                    |
| TS                        | 108    | 118                    | 146     | 136                     | 161                | 158                | 187                 | 163                    |
| post-complex              | -41    | -29                    | -43     | -40                     | -31                | -49                | -38                 | -43                    |
| MAE <sup>b</sup>          | 19.1   | 20.8                   | 6.4     | 10.6                    | 5.9                | 5.2                | 7.9                 | -                      |
| $\Delta E^o$              | -10    | -1                     | -13     | -10                     | -6                 | -22                | -13                 | -16                    |
| $\Delta E^\ddagger$       | 139    | 146                    | 176     | 166                     | 186                | 180                | 211                 | 190                    |

<sup>a</sup> All calculations using def2-TZVPP basis set. Energies in kJ/mol.

<sup>b</sup> Mean absolute error (MAE) calculated with respect to the CCSD(T) energy of the three stationary points and the sum of products.

Within our small test set, the M06 functional agrees best with CCSD(T). PBE0-D3 is a close second and chosen over M06 as it contains fewer fit parameters.

## 2) Alternative base catalysed TS structure

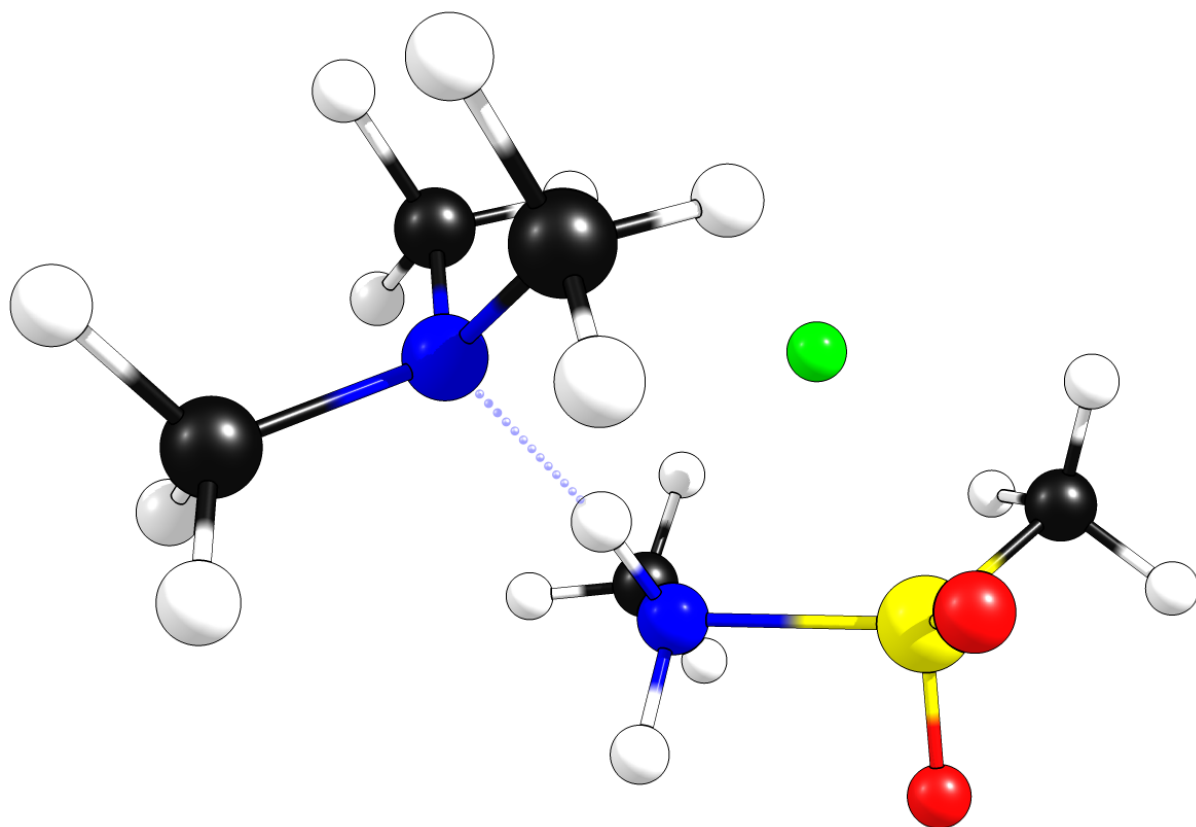

**Figure S1.** Alternative optimized (PBE-D3/def2-TZVPP) structure of the TS including  $\text{N}(\text{CH}_3)_3$ . This structure is less stable by 11 kJ/mol ( $\Delta E$ ) and 18 kJ/mol ( $\Delta G$ ) with respect to the structure given in the main manuscript.

### 3) Final structures

The endpoints of the reaction path calculations (IRC) are not the energetically optimal structures. Rearrangements of adducts can lead to more stable structures (lowest-energy minima). The reaction paths for these rearrangements have not been investigated, thus only thermodynamic data are given in Figure S2. Reaction energies in the main text (Table 2) are given with respect to the lowest-energy minima shown here.

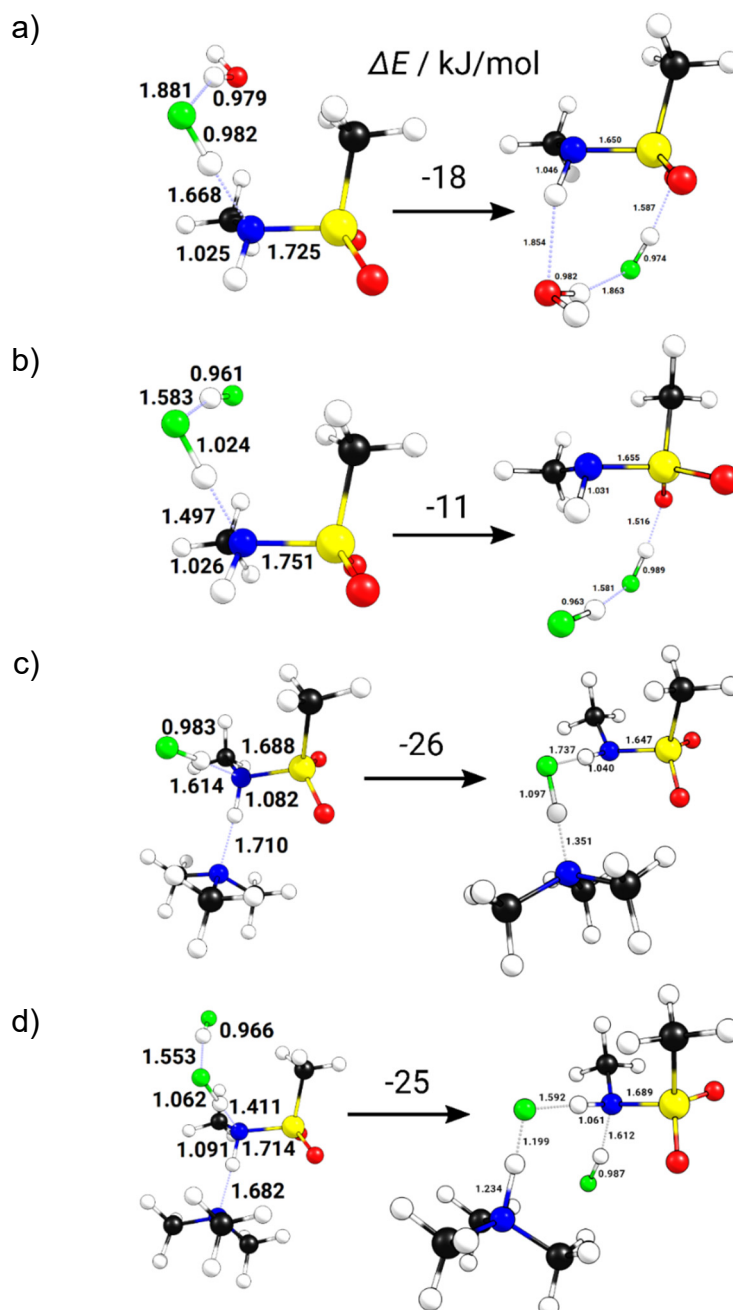

**Figure S2.** Optimized (PBE-D3/def2-TZVPP) structures of the IRC endpoints (left) and the most stable minima (right) found for post-complexes with additional **a)** H<sub>2</sub>O, **b)** HF, **c)** N(CH<sub>3</sub>)<sub>3</sub> and **d)** HF + N(CH<sub>3</sub>)<sub>3</sub>.

#### 4) Electronic reaction energies

**Table S2.** Reaction energies ( $\Delta E^0$ ) and barriers ( $\Delta E^\ddagger$ ) of the SuFEx reaction showing the influence of solvent (H<sub>2</sub>O), side-product (HF) and base (N(CH<sub>3</sub>)<sub>3</sub>).

| Solvent <sup>a</sup>                   | $\Delta E^0$ | $\Delta\Delta E^0$ | $\Delta E^\ddagger$ | $\Delta\Delta E^\ddagger$ |
|----------------------------------------|--------------|--------------------|---------------------|---------------------------|
| <i>in vacuo</i>                        | -37          | 0                  | 159                 | 0                         |
| +H <sub>2</sub> O (implicit)           | -51          | -14                | 145                 | -14                       |
| +H <sub>2</sub> O (explicit)           | -47          | -10                | 147                 | -12                       |
| +HF                                    | -12          | 25                 | 169                 | 10                        |
| +N(CH <sub>3</sub> ) <sub>3</sub>      | -72          | -35                | 124                 | -35                       |
| +HF & N(CH <sub>3</sub> ) <sub>3</sub> | -40          | -3                 | 125                 | -34                       |

<sup>a</sup> All energies in kJ/mol at PBE0/def2-TZVPP//PBE/def2-TZVPP. Solvent correction at PBE/def2-TZVPP. Energies are given with respect to the pre- and post-complexes.

The S<sub>N</sub>1 mechanism is not competitive due to a bond dissociation energy leading to fluorine anion of  $\Delta E^0[+\text{H}_2\text{O} (\text{implicit})] = 389$  kJ/mol. Furthermore, a nucleophilic attack by N(CH<sub>3</sub>)<sub>3</sub> with subsequent detachment of F<sup>-</sup> is an endothermic process with a reaction energy of  $\Delta E^0[+\text{H}_2\text{O} (\text{implicit})] = 124$  kJ/mol. This alternative pathway is therefore unfavorable when compared to the attack by **1**.

#### 5) Structure & output repository

All structures computed and connected raw data can be accessed via the open-data repository NOMAD under the permanent link:

DOI: <https://dx.doi.org/10.17172/NOMAD/2020.08.05-1>

## 6) Energy decomposition analysis

Shown in Table S3 are EDA results for an alternative fragmentation scheme of **3** with a donor-acceptor picture of the S-N bond with an anionic amine fragment and a cationic sulfonyl fragment. The considerably higher orbital energy term ( $\Delta E_{\text{orb}}$ ) indicates that this fragmentation is a worse description of the bonding situation compared to the neutral fragmentation (electron-sharing bond) discussed in the main manuscript.

**Table S3.** EDA of **3** with ionic fragments.

| <b>3</b>                   |        |    |
|----------------------------|--------|----|
|                            | kJ/mol | %  |
| $\Delta E_{\text{int}}$    | -1216  |    |
| $\Delta E_{\text{Pauli}}$  | 1851   |    |
| $\Delta E_{\text{elstat}}$ | -1686  | 45 |
| $\Delta E_{\text{orb}}$    | -1369  | 55 |

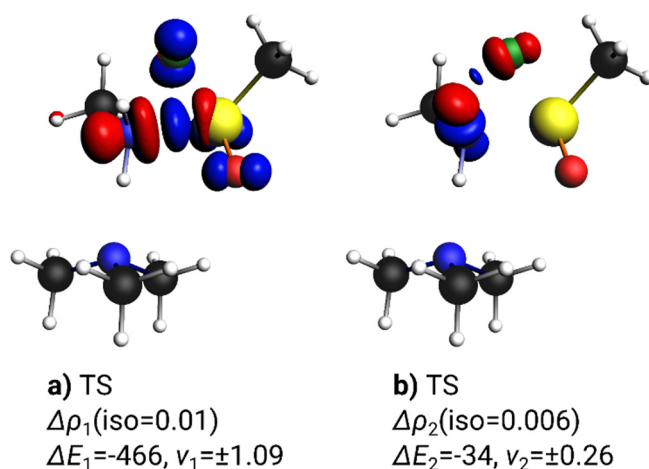

**Figure S3.** Selected deformation densities  $\Delta\rho_i$  show charge flow between NOCVs of **TS** including  $\text{N}(\text{CH}_3)_3$  and associated contributions to the total orbital energy ( $\Delta E_i$  in kJ/mol). Eigenvalues  $v_i$  quantify the amount of transferred electron density (red: charge depletion, blue: charge accumulation). Iso-values are chosen for visual clarity. Bonding character of  $\Delta\rho_i$  is a)  $\text{LP}(\text{N}) \rightarrow \text{p}^*(\text{S})$  donor-acceptor bond, b)  $\text{N-H}\cdots\text{F}$  hydrogen bond.

## 7) ADF sample input

```
Title Fragment-1
atoms
C   -1.09443   0.37015   1.37079
S    0.06532  -0.92532   0.96322
O    1.36096  -0.51978   1.48318
O   -0.52949  -2.20243   1.31729
H   -0.73518   1.31586   0.94975
H   -1.12288   0.43273   2.46469
H   -2.07542   0.10388   0.96595
end
symmetry NOSYM
Relativistic Scalar ZORA
SCF
Mixing 0.2
Iterations 300
End
XC
LDA LDA
GGA PBE
dispersion Grimme3 BJDamp
END
Basis
Type TZ2P
Core large
End
NumericalQuality Good
UNRESTRICTED
IRREPOCCUPATIONS
A 13 // 12
End

Title Fragment-2
atoms
C    1.11141  -0.08851  -1.37569
N    0.06724  -0.87545  -0.71265
H    2.13077  -0.40955  -1.11706
H    0.96131  -0.17303  -2.45911
H    1.00234   0.96903  -1.10396
H   -0.01551  -1.83698  -1.04366
end
symmetry NOSYM
Relativistic Scalar ZORA
SCF
Mixing 0.2
Iterations 300
End
XC
LDA LDA
GGA PBE
dispersion Grimme3 BJDamp
END
Basis
Type TZ2P
Core large
End
NumericalQuality Good
UNRESTRICTED
IRREPOCCUPATIONS
A 6 // 7
End

Title EDA-NOCV
atoms
C   -1.09443   0.37015   1.37079 f=f1
S    0.06532  -0.92532   0.96322 f=f1
O    1.36096  -0.51978   1.48318 f=f1
O   -0.52949  -2.20243   1.31729 f=f1
H   -0.73518   1.31586   0.94975 f=f1
H   -1.12288   0.43273   2.46469 f=f1
```

```
H -2.07542 0.10388 0.96595 f=f1
C 1.11141 -0.08851 -1.37569 f=f2
N 0.06724 -0.87545 -0.71265 f=f2
H 2.13077 -0.40955 -1.11706 f=f2
H 0.96131 -0.17303 -2.45911 f=f2
H 1.00234 0.96903 -1.10396 f=f2
H -0.01551 -1.83698 -1.04366 f=f2
end
charge 0
symmetry NOSYM
Relativistic Scalar ZORA
SCF
Mixing 0.2
Iterations 300
End
XC
LDA LDA
GGA PBE
dispersion Grimme3 BJDamp
END
Basis
Type TZ2P
Core large
End
NumericalQuality Good
UNRESTRICTEDFRAGMENTS
UNRESTRICTED
fragments
f1 f1.t21
f2 f2.t21
end
ETSNOCV
End
PRINT ETSLOWDIN-Unrestricted
```



## 8) Animated IRC

The animated intrinsic reaction coordinate for the reaction of methylamine and sulfonylfluoride is found as animated gif in a separate file (SI.irc.gif).

## 9) Cartesian coordinates, total energies and number of imaginary frequencies

**1**

Energy = -95.77003465279 Eh, imaginary frequencies = 0

|   |            |            |            |
|---|------------|------------|------------|
| C | 0.0516030  | 0.7048413  | -0.0000000 |
| N | 0.0566021  | -0.7615613 | -0.0000000 |
| H | -0.9476109 | 1.1815037  | 0.0000000  |
| H | 0.5951542  | 1.0679453  | 0.8834367  |
| H | 0.5951542  | 1.0679453  | -0.8834367 |
| H | -0.4470318 | -1.1133916 | -0.8151971 |
| H | -0.4470318 | -1.1133916 | 0.8151971  |

**2**

Energy = -688.0799266616 Eh, imaginary frequencies = 0

|   |           |           |            |
|---|-----------|-----------|------------|
| C | 8.6683491 | 8.5879006 | 14.3196027 |
| S | 8.8238522 | 6.8426502 | 14.6113375 |
| O | 7.5414410 | 6.2004057 | 14.5073913 |
| O | 9.7250963 | 6.5958853 | 15.7043752 |
| F | 9.6300623 | 6.4661106 | 13.2640808 |
| H | 8.1012075 | 8.7378607 | 13.3956971 |
| H | 9.6713351 | 9.0214523 | 14.2570220 |
| H | 8.1235563 | 8.9959746 | 15.1786034 |

**1-2**

Energy = -783.854102 Eh, imaginary frequencies = 0

|   |           |           |           |
|---|-----------|-----------|-----------|
| C | -1.208494 | 0.544828  | 2.140675  |
| S | -0.380007 | -0.103000 | 0.704385  |
| O | 1.043069  | -0.007711 | 0.897141  |
| O | -1.036987 | -1.307870 | 0.275350  |
| F | -0.810991 | 1.076336  | -0.306644 |
| H | -0.791181 | 1.530043  | 2.370834  |
| H | -1.009470 | -0.158770 | 2.956806  |
| H | -2.281402 | 0.599283  | 1.931742  |
| C | 2.095733  | 0.266683  | -2.161535 |
| N | 0.870408  | -0.533561 | -2.198707 |
| H | 2.665738  | 0.001670  | -1.261708 |
| H | 2.762348  | 0.160456  | -3.038651 |
| H | 1.828599  | 1.328861  | -2.067045 |
| H | 1.088725  | -1.529248 | -2.232531 |
| H | 0.325162  | -0.324208 | -3.035009 |

**TS**

Energy = -783.8087896901 Eh, imaginary frequencies = 1

|   |            |            |            |
|---|------------|------------|------------|
| C | -1.2399847 | 0.5019112  | 1.9141760  |
| S | -0.3244798 | -0.5019132 | 0.7217433  |
| O | 1.0411018  | -0.4682237 | 1.2390906  |
| O | -1.0918601 | -1.7269673 | 0.5453055  |
| F | -1.3599833 | 1.1387748  | -0.4781731 |
| H | -0.7971118 | 1.4992398  | 1.9260735  |
| H | -1.0875484 | -0.0274446 | 2.8645997  |
| H | -2.2818909 | 0.5279171  | 1.5956301  |
| C | 1.6040776  | 0.0172482  | -1.4846806 |
| N | 0.2265130  | -0.3850604 | -1.2416100 |
| H | 2.2953680  | -0.6360452 | -0.9396991 |
| H | 1.8231204  | -0.0277639 | -2.5619706 |
| H | 1.7366690  | 1.0472985  | -1.1369004 |
| H | -0.0131188 | -1.3217451 | -1.5742280 |
| H | -0.5320051 | 0.3629168  | -1.3907929 |

**3-HF**

Energy = -783.8680749412 Eh, imaginary frequencies = 0

|   |            |            |            |
|---|------------|------------|------------|
| C | -0.6547039 | 0.7887153  | 1.3792012  |
| S | 0.0699190  | -0.6224734 | 0.5716178  |
| O | 1.3970306  | -0.8337002 | 1.1189684  |
| O | -0.9027413 | -1.6946145 | 0.5010035  |
| F | -1.6016263 | 1.8153350  | -1.5024361 |
| H | 0.0278305  | 1.6407573  | 1.2881810  |

H -0.7655750 0.5040836 2.4318314  
H -1.6213014 1.0094036 0.9159737  
C 1.4905364 0.5816704 -1.4059997  
N 0.2051466 -0.0512683 -1.0500312  
H 2.3498236 -0.0731302 -1.2141857  
H 1.4483832 0.8508920 -2.4680988  
H 1.6079591 1.5056516 -0.8278681  
H 0.0004954 -0.8716159 -1.6292190  
H -0.9811664 1.0809735 -1.3679584

### 3

Energy = -683.4558352012 Eh, imaginary frequencies = 0

C -1.0944306 0.3701538 1.3707924  
S 0.0653164 -0.9253174 0.9632246  
O 1.3609646 -0.5197811 1.4831754  
O -0.5294902 -2.2024346 1.3172916  
H -0.7351804 1.3158556 0.9497520  
H -1.1228788 0.4327349 2.4646926  
H -2.0754166 0.1038809 0.9659543  
C 1.1114100 -0.0885077 -1.3756874  
N 0.0672447 -0.8754451 -0.7126454  
H 2.1307699 -0.4095533 -1.1170622  
H 0.9613114 -0.1730274 -2.4591053  
H 1.0023438 0.9690311 -1.1039578  
H -0.0155142 -1.8369796 -1.0436648

### HF

Energy = -100.3936173106 Eh, imaginary frequencies = 0

F -0.7369210 2.3513324 -0.8499349  
H -0.3906690 1.4881976 -0.8542551

### Precomplex benchmark

Energy = -783.8616672310 Eh, imaginary frequencies = 0

C 8.4172798 8.1182982 13.9396381  
S 9.6805205 6.8878776 14.0845431  
O 10.3652384 6.6788681 12.8366265  
O 10.3983651 7.0427959 15.3259148  
F 8.7204290 5.6001958 14.2890422  
H 7.7752832 7.8553006 13.0928865  
H 8.9374124 9.0648128 13.7497273  
H 7.8800803 8.1449696 14.9046121  
C 7.0051914 6.4384670 17.4030199  
N 7.7199955 7.6814269 17.0830970  
H 7.2252096 6.0185734 18.4011210  
H 5.9224450 6.6139945 17.3407832  
H 7.2586108 5.6763248 16.6541815  
H 8.7290640 7.5224624 17.1231744  
H 7.5116950 8.3976225 17.7798324

### Postcomplex benchmark

Energy = -783.8654355793 Eh, imaginary frequencies = 0

C -1.3847573 0.1317828 1.4882784  
S 0.1972966 -0.4894852 0.9530457  
O 1.2611867 0.3492587 1.4632235  
O 0.2325444 -1.9290973 1.1443379  
F -0.7445286 2.3702996 -0.8498369  
H -1.5044083 1.1609383 1.1316835  
H -1.3582986 0.0930973 2.5834792  
H -2.1721245 -0.5298264 1.1097333  
C 1.3668743 -0.4050840 -1.4424320  
N 0.0936900 -0.1304915 -0.7373326  
H 1.6637246 -1.4612438 -1.3726393  
H 1.2322023 -0.1287438 -2.4944020  
H 2.1495757 0.2243142 -1.0069806  
H -0.6510472 -0.7248077 -1.1172434  
H -0.3830629 1.4692316 -0.8543517

### 1-2+H<sub>2</sub>O

Energy = -860.2466089558 Eh, imaginary frequencies = 0

C -0.92308 0.41914 2.37017  
S -0.02093 0.17772 0.86514  
O 1.38204 -0.00497 1.11753

|   |          |          |          |
|---|----------|----------|----------|
| O | -0.74530 | -0.72016 | -0.00953 |
| F | -0.20281 | 1.64731  | 0.24996  |
| H | -0.44395 | 1.22751  | 2.93152  |
| H | -0.85771 | -0.52653 | 2.92083  |
| H | -1.96306 | 0.64523  | 2.09907  |
| C | 2.69152  | -0.45553 | -2.21029 |
| N | 1.30984  | -0.03358 | -2.46288 |
| H | 2.86451  | -0.47673 | -1.12604 |
| H | 2.96965  | -1.44627 | -2.61881 |
| H | 3.38140  | 0.28728  | -2.63543 |
| H | 0.65774  | -0.70625 | -2.05701 |
| H | 1.12249  | -0.02149 | -3.46616 |
| O | -3.50656 | 0.23585  | 0.44312  |
| H | -2.77068 | -0.23323 | 0.00821  |
| H | -3.77398 | 0.90895  | -0.20047 |

### TS+H<sub>2</sub>O

Energy = -860.2058593847 Eh, imaginary frequencies = 1

|   |            |            |            |
|---|------------|------------|------------|
| C | -1.2138352 | 0.5133081  | 1.9036351  |
| S | -0.4046711 | -0.5446323 | 0.6822125  |
| O | 0.9495406  | -0.6804556 | 1.2146411  |
| O | -1.2715457 | -1.6830113 | 0.4181375  |
| F | -1.3977963 | 1.0559039  | -0.5318598 |
| H | -0.7435474 | 1.4978264  | 1.8578235  |
| H | -0.9977738 | 0.0078983  | 2.8542489  |
| H | -2.2805066 | 0.5531740  | 1.6584670  |
| C | 1.6331555  | 0.0907090  | -1.4544274 |
| N | 0.2840021  | -0.4315899 | -1.2867948 |
| H | 2.3171963  | -0.4406731 | -0.7821464 |
| H | 1.9690323  | -0.0302677 | -2.4947915 |
| H | 1.6309335  | 1.1558968  | -1.1992899 |
| H | 0.1560247  | -1.3985436 | -1.5929368 |
| H | -0.4868718 | 0.2120557  | -1.5688029 |
| O | -3.9714773 | 0.4218734  | 0.1148322  |
| H | -3.9255633 | -0.5412967 | 0.0160406  |
| H | -3.1189505 | 0.7283867  | -0.2719648 |

### 3-HF+H<sub>2</sub>O

Energy = -860.2644063825 Eh, imaginary frequencies = 0

|   |            |            |            |
|---|------------|------------|------------|
| C | -0.8839200 | 0.4974500  | 1.5999900  |
| S | -0.1260300 | -0.9314000 | 0.8561400  |
| O | 1.1933200  | -1.1056400 | 1.4344100  |
| O | -1.0834500 | -2.0183000 | 0.8069900  |
| F | -1.7943603 | 1.3987188  | -1.3793739 |
| H | -0.2036500 | 1.3513000  | 1.5085500  |
| H | -1.0267900 | 0.2396900  | 2.6557800  |
| H | -1.8370200 | 0.6981600  | 1.1007900  |
| C | 1.3105900  | 0.2257700  | -1.1395400 |
| N | 0.0315100  | -0.4198200 | -0.7835500 |
| H | 2.1798000  | -0.3931000 | -0.8836700 |
| H | 1.2944200  | 0.4288000  | -2.2169200 |
| H | 1.3869700  | 1.1861300  | -0.6163700 |
| H | -0.1433600 | -1.2673100 | -1.3327800 |
| H | -1.1762900 | 0.6656300  | -1.1666700 |
| O | -0.0365236 | 3.1388469  | -0.0641493 |
| H | 0.0749401  | 4.0491244  | -0.3739740 |
| H | -0.7588158 | 2.7678555  | -0.6108532 |

### Postcomplex+H<sub>2</sub>O

Energy = -860.2699920221 Eh, imaginary frequencies = 0

|   |            |           |            |
|---|------------|-----------|------------|
| C | 7.9394756  | 8.5046288 | 14.0874823 |
| S | 9.0999897  | 7.4612966 | 14.9401213 |
| O | 9.0379403  | 6.1558631 | 14.2436450 |
| O | 10.3843683 | 8.1286720 | 15.0376590 |
| F | 10.1592238 | 4.3873945 | 15.7038503 |
| H | 6.9415677  | 8.0554599 | 14.1358884 |
| H | 8.2766704  | 8.5589445 | 13.0464045 |
| H | 7.9575080  | 9.4902373 | 14.5621338 |
| C | 7.3570413  | 6.4502531 | 16.6902727 |
| N | 8.4861174  | 7.3667195 | 16.4692651 |
| H | 7.0929585  | 6.5103468 | 17.7524400 |
| H | 6.4842809  | 6.7743697 | 16.1089145 |

H 7.5914549 5.4064213 16.4350443  
H 9.3019237 7.1378709 17.0821530  
H 9.7549435 5.0074364 15.0707733  
O 10.8035380 6.2483551 17.7064858  
H 11.5151648 6.7779780 17.3120288  
H 10.7258330 5.4735725 17.1074577

### H<sub>2</sub>O

Energy = -860.2644063825 Eh, imaginary frequencies = 0

O -0.0365236 3.1388469 -0.0641493  
H 0.0749401 4.0491244 -0.3739740  
H -0.7588158 2.7678555 -0.6108532

### 1-2+HF

Energy = -884.2779825723 Eh, imaginary frequencies = 0

C -0.5958258 0.1114509 3.6488112  
S -0.3843803 0.7426340 2.0030546  
O 0.7784629 1.5856543 1.9351936  
O -0.6113374 -0.3117352 1.0435811  
F -1.6665074 1.6914371 1.9562628  
H -0.5388792 0.9493275 4.3506547  
H 0.2270499 -0.5923871 3.8178958  
H -1.5614569 -0.4006926 3.7051219  
C 1.8388498 1.2311224 -1.4439825  
N 0.4199736 0.8964415 -1.6484930  
H 1.9769489 1.5468439 -0.4031772  
H 2.5260368 0.3956573 -1.6538575  
H 2.1079501 2.0764168 -2.0896083  
H 0.1322530 0.1470440 -1.0150564  
H 0.2517866 0.5754769 -2.6021657  
F -1.0623525 2.8655849 -0.9472542  
H -0.5007522 2.1077435 -1.2619311

### TS+HF

Energy = -884.2276478150 Eh, imaginary frequencies = 1

C -1.3133454 0.4366312 1.9492223  
S -0.3394250 -0.4991832 0.7508587  
O 1.0308061 -0.4005630 1.2335293  
O -1.0632565 -1.7470628 0.5551151  
F -1.1693673 1.2719986 -0.4223825  
H -0.8799187 1.4349276 2.0266761  
H -1.1837581 -0.1449811 2.8722807  
H -2.3518463 0.4635409 1.6083262  
C 1.5641364 0.0678927 -1.5225329  
N 0.2301542 -0.4655162 -1.2709085  
H 2.2973587 -0.4719827 -0.9136678  
H 1.8229006 -0.0288135 -2.5874538  
H 1.5699837 1.1264727 -1.2432806  
H 0.0975237 -1.4441849 -1.5355665  
H -0.5283295 0.1599870 -1.5854458  
F -3.5953254 1.4241547 -0.0514110  
H -2.6444156 1.4246603 -0.2612591

### 3-HF+HF

Energy = -884.2829952749 Eh, imaginary frequencies = 0

C -0.8845844 0.4942221 1.6452877  
S -0.1586602 -0.9196493 0.8517054  
O 1.1664528 -1.1385447 1.3951637  
O -1.1306135 -1.9902557 0.7585009  
F -1.6444640 1.4610870 -1.3578574  
H -0.2545523 1.3750693 1.4729232  
H -0.9215845 0.2420756 2.7115480  
H -1.8897989 0.6469525 1.2398618  
C 1.3203549 0.2409190 -1.1358148  
N 0.0044894 -0.3537852 -0.7971891  
H 2.1495664 -0.4174625 -0.8526466  
H 1.3328786 0.4217295 -2.2173075  
H 1.4155933 1.2063760 -0.6263198  
H -0.1850992 -1.1951371 -1.3534154  
H -1.0336295 0.6682507 -1.1412435  
F -0.1604488 3.1126466 -0.1566600  
H -0.7995002 2.6082963 -0.6677563

**Postcomplex+HF**

Energy = -884.2843517198 Eh, imaginary frequencies = 0

|   |            |            |            |
|---|------------|------------|------------|
| C | -0.9378910 | 0.7150071  | 1.6370515  |
| S | -0.1762831 | -0.8645731 | 1.3503287  |
| O | 1.1399373  | -0.7821563 | 2.0314310  |
| O | -1.0789709 | -1.9336466 | 1.7149541  |
| F | 1.3955663  | -3.4129648 | -0.7078726 |
| H | -0.3015330 | 1.5081528  | 1.2302675  |
| H | -1.0242476 | 0.8232366  | 2.7239810  |
| H | -1.9221502 | 0.7070298  | 1.1594123  |
| C | 1.1036085  | -0.1311723 | -0.8834624 |
| N | -0.0013193 | -0.9047860 | -0.2949351 |
| H | 2.0933815  | -0.4535224 | -0.5306517 |
| H | 1.0499168  | -0.2608706 | -1.9701477 |
| H | 0.9719355  | 0.9356719  | -0.6637665 |
| H | 0.0438486  | -1.8990478 | -0.5630563 |
| H | 1.9583167  | -3.1840405 | 0.0386921  |
| F | 2.7302296  | -2.5525023 | 1.2658090  |
| H | 2.1288542  | -1.8621756 | 1.6407650  |

**1-2+TMA**

Energy = -958.1680364104 Eh, imaginary frequencies = 0

|   |            |            |            |
|---|------------|------------|------------|
| C | -1.1785223 | 1.2542235  | 3.3943009  |
| S | -0.6683119 | 0.9408192  | 1.7180888  |
| O | 0.5932191  | 0.2476008  | 1.7242108  |
| O | -1.7981705 | 0.4947712  | 0.9478292  |
| F | -0.3752290 | 2.4666077  | 1.3106633  |
| H | -0.3448963 | 1.7139794  | 3.9341717  |
| H | -1.4293731 | 0.2796742  | 3.8280545  |
| H | -2.0576240 | 1.9059149  | 3.3764781  |
| C | 1.9583377  | 1.5359622  | -1.2152128 |
| N | 0.5477502  | 1.2164049  | -1.4322274 |
| H | 2.3595859  | 0.8692493  | -0.4386636 |
| H | 2.6118785  | 1.4481886  | -2.1061687 |
| H | 2.0534484  | 2.5631866  | -0.8331188 |
| H | 0.4546141  | 0.2590853  | -1.7991325 |
| H | 0.1450682  | 1.8442047  | -2.1285755 |
| N | 0.2409668  | -1.8398715 | -2.0042057 |
| C | 1.0584146  | -2.2775037 | -0.8794870 |
| C | -1.1790432 | -1.9785291 | -1.7050943 |
| C | 0.5989756  | -2.5446235 | -3.2252214 |
| H | 0.9084226  | -3.3539299 | -0.6412371 |
| H | -1.4696785 | -3.0353117 | -1.5136689 |
| H | 0.4271036  | -3.6419176 | -3.1525369 |
| H | 2.1212102  | -2.1247084 | -1.1137240 |
| H | 0.8132961  | -1.6839415 | 0.0105935  |
| H | -1.4318037 | -1.3778708 | -0.8219121 |
| H | -1.7724157 | -1.6101938 | -2.5536317 |
| H | 0.0025634  | -2.1617143 | -4.0649799 |
| H | 1.6616741  | -2.3806217 | -3.4517597 |

**TS+TMA**

Energy = -958.1333799151 Eh, imaginary frequencies = 1

|   |            |            |            |
|---|------------|------------|------------|
| C | -1.0383741 | 0.3377151  | 1.9854745  |
| S | -0.5851250 | -0.7132275 | 0.5805362  |
| O | 0.7578258  | -1.1544768 | 0.9842519  |
| O | -1.6554909 | -1.6813504 | 0.3742617  |
| F | -1.5467339 | 1.0432625  | -0.3035673 |
| H | -0.3934741 | 1.2194109  | 1.9704772  |
| H | -0.8318170 | -0.2913821 | 2.8609231  |
| H | -2.0866109 | 0.6127888  | 1.8729676  |
| C | 1.2452879  | 0.0943483  | -1.5280639 |
| N | -0.0825592 | -0.4718187 | -1.3149908 |
| H | 1.9800194  | -0.4794794 | -0.9508904 |
| H | 1.4997577  | 0.0475056  | -2.5970924 |
| H | 1.2548260  | 1.1401301  | -1.2001525 |
| H | -0.1963287 | -1.4497111 | -1.7379569 |
| H | -0.8546406 | 0.2105303  | -1.4959112 |
| N | -0.3320479 | -3.0692240 | -2.4154470 |
| C | 0.1973649  | -3.9780451 | -1.3946956 |
| C | -1.7683268 | -3.2825238 | -2.6096075 |

|   |            |            |            |
|---|------------|------------|------------|
| C | 0.3992534  | -3.2043906 | -3.6733087 |
| H | 0.1014362  | -5.0387639 | -1.7012572 |
| H | -1.9883609 | -4.3102899 | -2.9609668 |
| H | 0.3009178  | -4.2200218 | -4.1072297 |
| H | 1.2587958  | -3.7583845 | -1.2187211 |
| H | -0.3469924 | -3.8232074 | -0.4559049 |
| H | -2.2896352 | -3.1050068 | -1.6612636 |
| H | -2.1483006 | -2.5725708 | -3.3568917 |
| H | 0.0170817  | -2.4799918 | -4.4056287 |
| H | 1.4665417  | -3.0054552 | -3.5053942 |

### 3-HF+TMA

Energy = -958.1947460420 Eh, imaginary frequencies = 0

|   |            |            |            |
|---|------------|------------|------------|
| C | -0.6537300 | 1.7528355  | 2.0602074  |
| S | 0.2608874  | 0.3063825  | 1.5565987  |
| O | 1.5146321  | 0.2830871  | 2.2920964  |
| O | -0.6360716 | -0.8382549 | 1.5871997  |
| F | -1.4465627 | 1.8369173  | -1.2018535 |
| H | -0.0218762 | 2.6380942  | 1.9269433  |
| H | -0.8894083 | 1.6142897  | 3.1214763  |
| H | -1.5627269 | 1.8228935  | 1.4538801  |
| C | 1.7966113  | 1.3291436  | -0.3956462 |
| N | 0.5494470  | 0.6146253  | -0.0776628 |
| H | 2.6811763  | 0.8336909  | 0.0258297  |
| H | 1.8820115  | 1.3717992  | -1.4886226 |
| H | 1.7560804  | 2.3601854  | -0.0208196 |
| H | 0.4518519  | -0.3188759 | -0.6151508 |
| H | -0.6983473 | 1.3814071  | -0.7554757 |
| N | 0.1015620  | -1.6800318 | -1.5895383 |
| C | 0.6381487  | -2.8761331 | -0.9392678 |
| C | -1.3649875 | -1.6986745 | -1.6094085 |
| C | 0.6447178  | -1.5072697 | -2.9356535 |
| H | 0.3513753  | -3.8026423 | -1.4749795 |
| H | -1.7544037 | -2.5438955 | -2.2099571 |
| H | 0.3627740  | -2.3409659 | -3.6094670 |
| H | 1.7347085  | -2.8187259 | -0.9080457 |
| H | 0.2604922  | -2.9267664 | 0.0896691  |
| H | -1.7363172 | -1.7860655 | -0.5811180 |
| H | -1.7374943 | -0.7565087 | -2.0324942 |
| H | 0.2643157  | -0.5716068 | -3.3672362 |
| H | 1.7412586  | -1.4569815 | -2.8903769 |

### Postcomplex+TMA

Energy = -958.2037320924 Eh, imaginary frequencies = 0

|   |            |            |            |
|---|------------|------------|------------|
| C | -0.7607754 | -0.3342653 | 1.3834323  |
| S | -0.7296020 | -0.4721504 | -0.4046993 |
| O | 0.1295005  | -1.5894253 | -0.7533501 |
| O | -2.1196930 | -0.4392803 | -0.8442683 |
| F | -1.7311863 | 2.8792963  | -0.0170773 |
| H | 0.2695100  | -0.2946908 | 1.7552124  |
| H | -1.2690426 | -1.2233177 | 1.7736576  |
| H | -1.3085288 | 0.5791892  | 1.6428419  |
| C | 1.4065048  | 1.0875307  | -0.7749433 |
| N | -0.0331873 | 0.9114119  | -0.9633055 |
| H | 1.9254070  | 0.1761801  | -1.0916538 |
| H | 1.7360532  | 1.9155489  | -1.4149723 |
| H | 1.6906059  | 1.3205635  | 0.2661742  |
| H | -0.6135356 | 1.7271418  | -0.6817646 |
| H | -4.6357325 | 4.3121468  | -0.4396571 |
| H | -4.8923724 | 2.0573501  | 0.3909395  |
| C | -4.4044842 | 3.9252009  | -1.4395503 |
| C | -4.6684932 | 1.6556829  | -0.6051959 |
| H | -5.3332547 | 3.8793928  | -2.0335413 |
| H | -5.6138571 | 1.5107454  | -1.1554272 |
| H | -3.6991744 | 4.6090610  | -1.9270332 |
| N | -3.7853367 | 2.5970870  | -1.3167128 |
| H | -2.6566895 | 2.7443100  | -0.5896849 |
| H | -4.1488648 | 0.6967251  | -0.5018952 |
| C | -3.3952570 | 2.0633715  | -2.6353927 |
| H | -4.2772599 | 1.9470447  | -3.2879246 |
| H | -2.6886507 | 2.7572429  | -3.1072518 |
| H | -2.9065234 | 1.0926362  | -2.4943764 |

**TMA**

Energy = -174.3028656920 Eh, imaginary frequencies = 0

|   |            |            |            |
|---|------------|------------|------------|
| N | -0.3198409 | 0.2028080  | 0.0000000  |
| C | 0.7935396  | 1.1370121  | -0.0000000 |
| C | -0.3193584 | -0.6175753 | 1.1996803  |
| C | -0.3193584 | -0.6175753 | -1.1996803 |
| H | 1.7855182  | 0.6289792  | 0.0000000  |
| H | 0.5911657  | -1.2538421 | 1.2894009  |
| H | 0.5911657  | -1.2538421 | -1.2894009 |
| H | 0.7413716  | 1.7788329  | -0.8905692 |
| H | 0.7413716  | 1.7788329  | 0.8905692  |
| H | -0.3733092 | 0.0244888  | 2.0900339  |
| H | -1.1966781 | -1.2793040 | 1.1986526  |
| H | -1.1966781 | -1.2793040 | -1.1986526 |
| H | -0.3733092 | 0.0244888  | -2.0900339 |

**1-2+HF+TMA**

Energy = -1058.594981171 Eh, imaginary frequencies = 0

|   |            |            |            |
|---|------------|------------|------------|
| C | -0.6962972 | 0.4563336  | 3.9861503  |
| S | -0.7250993 | 0.4847401  | 2.2076807  |
| O | 0.6150339  | 0.6529420  | 1.7053510  |
| O | -1.6001485 | -0.5453661 | 1.7167894  |
| F | -1.4759057 | 1.8843146  | 2.0322688  |
| H | -0.1302769 | 1.3232437  | 4.3411183  |
| H | -0.1974085 | -0.4759620 | 4.2737039  |
| H | -1.7279461 | 0.4703568  | 4.3514386  |
| C | 1.9785109  | 1.4585428  | -1.4885049 |
| N | 0.7709799  | 0.9873408  | -2.1829417 |
| H | 1.9428755  | 1.1139410  | -0.4480339 |
| H | 2.9172929  | 1.1058550  | -1.9472848 |
| H | 1.9915338  | 2.5562264  | -1.4720399 |
| H | 0.7400116  | -0.0524638 | -2.2125621 |
| H | 0.7499606  | 1.3263302  | -3.1454423 |
| F | -1.3278412 | 1.5224798  | -0.8897582 |
| H | -0.4874260 | 1.3491675  | -1.4328986 |
| N | 0.3153449  | -1.9488898 | -1.8802816 |
| C | 0.9767278  | -2.2532931 | -0.6144708 |
| C | -1.1360009 | -1.8748070 | -1.7038557 |
| C | 0.6746484  | -2.9196203 | -2.9057103 |
| H | 0.6720671  | -3.2424837 | -0.2102860 |
| H | -1.5589456 | -2.8382129 | -1.3491501 |
| H | 0.3547643  | -3.9512554 | -2.6432071 |
| H | 2.0664647  | -2.2618909 | -0.7579789 |
| H | 0.7260289  | -1.4857471 | 0.1278519  |
| H | -1.3863673 | -1.0890195 | -0.9803470 |
| H | -1.6087422 | -1.6228136 | -2.6630057 |
| H | 0.1991745  | -2.6479458 | -3.8582935 |
| H | 1.7642688  | -2.9262748 | -3.0492874 |

**TS+HF+TMA**

Energy = -1058.558874895 Eh, imaginary frequencies = 1

|   |            |            |            |
|---|------------|------------|------------|
| C | -0.9580633 | 0.1347697  | 2.1222232  |
| S | -0.5759257 | -0.6345418 | 0.5217793  |
| O | 0.7684498  | -1.1652319 | 0.7607470  |
| O | -1.7554105 | -1.4608366 | 0.2644889  |
| F | -0.8579617 | 1.4446771  | 0.0711986  |
| H | -0.1823268 | 0.8684068  | 2.3474084  |
| H | -0.9357192 | -0.7117304 | 2.8201883  |
| H | -1.9454402 | 0.5933525  | 2.0577853  |
| C | 1.0393041  | 0.2376965  | -1.7723692 |
| N | -0.2280042 | -0.4098174 | -1.4292018 |
| H | 1.8476941  | -0.2571838 | -1.2224715 |
| H | 1.2202934  | 0.1399973  | -2.8527313 |
| H | 0.9935265  | 1.2958411  | -1.5000289 |
| H | -0.2546041 | -1.4314886 | -1.7523202 |
| H | -1.0357713 | 0.1157216  | -1.8068320 |
| F | -2.1032036 | 1.6075094  | -1.9584617 |
| H | -1.6569521 | 1.6693834  | -1.0673358 |
| N | -0.3200000 | -3.0894287 | -2.3504208 |
| C | 0.0921469  | -3.9836079 | -1.2652292 |
| C | -1.7292717 | -3.2957554 | -2.6916508 |



|   |            |            |            |
|---|------------|------------|------------|
| C | 0.5390071  | -3.2531203 | -3.5217723 |
| H | 0.0322832  | -5.0483484 | -1.5672742 |
| H | -1.9222583 | -4.3275419 | -3.0467499 |
| H | 0.4794918  | -4.2765921 | -3.9438812 |
| H | 1.1246067  | -3.7559363 | -0.9705748 |
| H | -0.5561966 | -3.8209156 | -0.3964123 |
| H | -2.3469810 | -3.0990136 | -1.8067827 |
| H | -2.0233581 | -2.5959813 | -3.4858127 |
| H | 0.2412675  | -2.5414806 | -4.3040984 |
| H | 1.5835060  | -3.0555371 | -3.2452942 |

### 3-HF+HF+TMA

Energy = -1058.610446129 Eh, imaginary frequencies = 0

|   |            |            |            |
|---|------------|------------|------------|
| C | -0.6584753 | 1.3582240  | 2.1908335  |
| S | 0.1570258  | -0.1100887 | 1.6048738  |
| O | 1.4201621  | -0.2610411 | 2.3049689  |
| O | -0.8010854 | -1.2027304 | 1.5648725  |
| F | -0.2983656 | 3.7151746  | -0.0481594 |
| H | -0.0319331 | 2.2334940  | 1.9852820  |
| H | -0.7918635 | 1.2169871  | 3.2694667  |
| H | -1.6221726 | 1.4483581  | 1.6797237  |
| C | 1.7262029  | 0.9929645  | -0.2999705 |
| N | 0.4635660  | 0.2666041  | -0.0384622 |
| H | 2.5773443  | 0.5109426  | 0.1956521  |
| H | 1.8817979  | 0.9953746  | -1.3859493 |
| H | 1.6378016  | 2.0346782  | 0.0317076  |
| H | 0.4242063  | -0.6775486 | -0.5828807 |
| H | -0.5931429 | 1.0171261  | -0.5969864 |
| F | -1.3205495 | 1.6540716  | -1.0374950 |
| H | -0.7702224 | 3.0028366  | -0.4979987 |
| N | 0.2251409  | -2.0532942 | -1.5304808 |
| C | 0.7763981  | -3.1930548 | -0.7932650 |
| C | -1.2306717 | -2.1655430 | -1.6700318 |
| C | 0.8709507  | -1.8919837 | -2.8332858 |
| H | 0.6007482  | -4.1496735 | -1.3225189 |
| H | -1.5178638 | -3.0548985 | -2.2632842 |
| H | 0.6968758  | -2.7636083 | -3.4943879 |
| H | 1.8590765  | -3.0594462 | -0.6651400 |
| H | 0.3095707  | -3.2408648 | 0.1983479  |
| H | -1.6828881 | -2.2362672 | -0.6733838 |
| H | -1.6216066 | -1.2679106 | -2.1675524 |
| H | 0.4762771  | -0.9963229 | -3.3317399 |
| H | 1.9543034  | -1.7730933 | -2.6976330 |

### Postcomplex+HF+TMA

Energy = -1058.619941395 Eh, imaginary frequencies = 0

|   |            |            |            |
|---|------------|------------|------------|
| C | -0.5477393 | 0.1650203  | 1.8389692  |
| S | -0.9428982 | -0.6635273 | 0.3033335  |
| O | -0.1536314 | -1.8762499 | 0.2026632  |
| O | -2.3888736 | -0.6955091 | 0.1836367  |
| F | -1.6032896 | 2.6707308  | -0.2198994 |
| H | 0.5402954  | 0.2542976  | 1.9317516  |
| H | -0.9455286 | -0.4605674 | 2.6460141  |
| H | -1.0315256 | 1.1487667  | 1.8222932  |
| C | 1.0531695  | 0.4791621  | -1.0871069 |
| N | -0.4038232 | 0.4058122  | -0.8881817 |
| H | 1.4496082  | -0.5281038 | -1.2517631 |
| H | 1.2370276  | 1.0853019  | -1.9824462 |
| H | 1.5759295  | 0.9430258  | -0.2362001 |
| H | -1.1561555 | 0.1704208  | -2.2939856 |
| H | -0.8303132 | 1.3504671  | -0.6600973 |
| H | -4.7299626 | 3.4071679  | 0.1502184  |
| H | -4.4490207 | 1.0454470  | -0.4342242 |
| C | -4.5178924 | 3.7050517  | -0.8831047 |
| C | -4.3030313 | 1.3462019  | -1.4770614 |
| H | -5.4645145 | 3.8140368  | -1.4344183 |
| H | -5.2717284 | 1.3781842  | -1.9996628 |
| H | -3.9852088 | 4.6632420  | -0.8750542 |
| N | -3.6631764 | 2.6809381  | -1.5129482 |
| H | -2.6206512 | 2.6489435  | -0.8532740 |
| H | -3.6419786 | 0.6208435  | -1.9622922 |
| C | -3.2908531 | 3.0568801  | -2.8941847 |

H -4.1904126 3.1510756 -3.5218854  
H -2.7595568 4.0157935 -2.8704425  
H -2.6343604 2.2793027 -3.3020614  
F -1.6044741 0.2114937 -3.1726157

#### MeSO<sub>2</sub><sup>+</sup>

Energy = -587.9194567583 Eh, imaginary frequencies = 0

C 8.6530594 8.6264342 14.3349389  
S 8.6962542 6.9135512 14.8214827  
O 7.5866849 6.1297410 14.3855067  
O 9.8216808 6.5333871 15.6117569  
H 8.0892085 8.6747205 13.3938944  
H 9.6956131 8.9656976 14.2747082  
H 8.1123490 9.1385984 15.1517422

#### MeSO<sub>2</sub><sup>+</sup>+TMA

Energy = -762.3381801520, imaginary frequencies = 0

C -0.7566991 -0.3103244 1.5644913  
S -0.6424989 -0.8826264 -0.1147468  
O 0.3429577 -1.9254645 -0.2307961  
O -1.9445614 -0.9226524 -0.7272141  
H 0.2448847 -0.1534248 1.9762778  
H -1.2443728 -1.1482318 2.0841281  
H -1.3949182 0.5770921 1.6158436  
C 1.5735857 0.8479691 -0.4881612  
N 0.2133674 0.6124535 -1.0494596  
H 2.1310651 -0.0940076 -0.4944171  
H 2.0836048 1.5873014 -1.1182357  
H 1.4898397 1.2419008 0.5297135  
C -0.6493109 1.8246163 -0.9608064  
H -0.2239003 2.5985549 -1.6116637  
H -0.6650006 2.1929187 0.0699395  
H -1.6594677 1.5706575 -1.2972723  
C 0.3019088 0.1291693 -2.4651944  
H 0.7666326 0.9225073 -3.0624766  
H -0.7064671 -0.0796143 -2.8361558  
H 0.9168505 -0.7757247 -2.4972541

#### 1-2+(H<sub>2</sub>O)<sub>3</sub>

Energy = -1013.057253848, imaginary frequencies = 0

C -1.6068240 0.6198377 2.3667436  
S -0.1635322 0.0398134 1.5304054  
O 0.9189705 -0.2107551 2.4431912  
O -0.5149102 -0.9098412 0.5021806  
F 0.2243349 1.4087399 0.7463260  
H -1.2918729 1.3739032 3.0955717  
H -2.0289142 -0.2553265 2.8752827  
H -2.3081929 1.0334651 1.6226671  
C 0.9985353 0.1365811 -2.7140788  
N -0.3373475 -0.4618759 -2.5745794  
H 1.1302300 0.8978107 -1.9341836  
H 1.8290910 -0.5842828 -2.6297716  
H 1.0741309 0.6408451 -3.6863232  
H -0.4235701 -0.9078522 -1.6582686  
H -0.4795318 -1.1875252 -3.2779009  
H -2.6651287 2.7436544 -0.1715147  
O -3.3270915 2.0638058 0.1459523  
O -1.4506412 3.5828530 -1.0692942  
H -0.5752056 3.3925315 -0.6997696  
H -4.1607216 2.5468369 0.2436961  
H -1.5845793 2.8934548 -1.7894095  
H -1.5773346 0.7822963 -2.6282692  
H -2.8519418 1.3414017 -1.8942566  
O -2.2300325 1.5507982 -2.6164670

#### TS+(H<sub>2</sub>O)<sub>3</sub>

Energy = -1013.000779140, imaginary frequencies = 1

O 5.9975357 8.4600871 7.8918768  
O 8.5406791 7.3130614 8.3551947  
H 6.0515021 9.8458309 9.1895236  
H 6.0068861 8.7684669 6.9740067  
H 6.8361814 7.9617789 8.0056209

|   |            |            |            |
|---|------------|------------|------------|
| H | 8.8061064  | 7.4158167  | 9.3027647  |
| H | 8.7915506  | 6.4128382  | 8.1008212  |
| S | 9.7728922  | 9.7104698  | 10.7311372 |
| O | 9.5686942  | 8.2464943  | 10.6785116 |
| F | 8.7948258  | 11.4773257 | 9.8106410  |
| H | 9.5854782  | 10.7567413 | 8.6184393  |
| H | 6.9782188  | 10.9948616 | 9.6915739  |
| C | 8.5284003  | 10.2084634 | 11.9372664 |
| O | 6.1687648  | 10.4920529 | 9.9177218  |
| H | 8.6872649  | 11.2664331 | 12.1476026 |
| H | 8.7395189  | 9.5514709  | 12.7913149 |
| H | 7.5385696  | 10.0257234 | 11.4945096 |
| H | 11.8469958 | 8.7408118  | 8.6086114  |
| H | 11.5731828 | 9.8780221  | 7.2517237  |
| H | 9.4786867  | 9.0579244  | 8.2948358  |
| N | 10.0452933 | 9.8207408  | 8.6929653  |
| O | 11.0582019 | 10.2573419 | 11.1245442 |
| C | 11.4567564 | 9.7281557  | 8.3352665  |
| H | 12.0162338 | 10.4993750 | 8.8735920  |

## 10) References

- S1. Tao, J.; Perdew, J. P.; Staroverov, V. N.; Scuseria, G. E. Climbing the Density Functional Ladder: Nonempirical Meta-Generalized Gradient Approximation Designed for Molecules and Solids. *Phys. Rev. Lett.* **2003**, *91*, 146401.
- S2. Stephens, P. J.; Devlin, F. J.; Chabalowski, C. F.; Frisch, M. J. Ab Initio Calculation of Vibrational Absorption and Circular Dichroism Spectra Using Density Functional Force Fields. *J. Phys. Chem.* **1994**, *98*, 11623–11627.
- S3. Zhao, Y.; Truhlar, D. G. The M06 suite of density functionals for main group thermochemistry, thermochemical kinetics, noncovalent interactions, excited states, and transition elements: two new functionals and systematic testing of four M06-class functionals and 12 other functionals. *Theo. Chem. Acc.* **2008**, *120*, 215–241.
- S4. Tew, D. P.; Klopper, W.; Neiss, C.; Hättig, C. Quintuple- $\zeta$  quality coupled-cluster correlation energies with triple- $\zeta$  basis sets. *Phys. Chem. Chem. Phys.* **2007**, *9*, 1921–1930.
